# Supplementary material for: Potential Use of Wollastonite as a Filler in UF Resin Based Medium-Density Fiberboard (MDF)
Source: Polymers (Basel). 2020 Jun 27;12(7):1435. doi: 10.3390/polym12071435 (PMC7408164; doi:10.3390/polym12071435)
Supplement: Supplementary file 1 [file polymers-12-01435-s001.pdf]

## Details of the total energy calculation in DFT.

The total energy,  $E_{tot}$ , in density functional theory (DFT) is given by the sum of the kinetic energy,  $E_{kin}$ ; the electron-core Coulomb energy,  $E_{ec}$ ; the electron-electron Coulomb energy,  $E_{ee}$ ; the exchange-correlation energy,  $E_{xc}$ ; and the core-core Coulomb energy,  $E_{cc}$ , between the pseudocore charges  $Z_i$  and  $Z_j$  as follows:

$$E_{tot} = E_{kin} + E_{ec} + E_{ee} + E_{xc} + E_{cc}, \quad (1)$$

with

$$E_{kin} = 2 \sum_{i\alpha, j\beta} \rho_{i\alpha, j\beta} \int d(r) \chi_{i\alpha} \hat{T} \chi_{j\beta}, \quad (2)$$

$$E_{ec} = E_{ec}^{(L)} + E_{ec}^{(NL)} = \int d(r) n(r) \sum_k V_{L,k}(r - R_k) + \int d(r) n(r) \sum_k NV_{L,k}(r - R_k) \quad (3)$$

$$E_{ee} = \frac{1}{2} \iint d(r) d(r') \frac{n(r) n(r')}{|r - r'|}, \quad (4)$$

$$E_{xc} = \int d(r) n \varepsilon_{xc}(n), \quad (5)$$

$$E_{cc} = \frac{1}{2} \sum_{i,j} \frac{Z_i Z_j}{|R_i - R_j|}, \quad (6)$$

where  $i$  and  $\alpha$  are the site and basis function indices, respectively.  $\rho_{i\alpha, j\beta}$  is the density matrix associated with two basis functions,  $i$  and  $j$ , and is defined by  $\chi_{i\alpha}$  and  $\chi_{j\beta}$ . These are defined by  $\sum_v \Theta(\varepsilon_v - \mu) c_{i\alpha, v} c_{j\beta, v}$  with the linear combination of numerical atomic local basis orbitals (LCAO) coefficient,  $c_{i\alpha, v}$ ; the one particle eigen-energy,  $\varepsilon_v$ ; the chemical potential,  $\mu$ ; and a step function,  $\Theta(x)$ .  $n$  is the electro density defined by  $2 \sum_{i\alpha, j\beta} \rho_{i\alpha, j\beta} \chi_{i\alpha} \chi_{j\beta}$ .  $V_{L,k}$  and  $V_{NL,k}$  are the local and non-local parts in the norm-conserving pseudopotential of atom  $k$ , respectively. The factor 2 in  $E_{kin}$  and  $n$  is for the spin multiplicity [1].

[1] Ozaki, T., Kino, H., Efficient projector expansion for the ab initio LCAO method. *Physical Review B* 2005, 72, 045121.
